# Supplementary material for: Excellent UV-Light Triggered Photocatalytic Performance of ZnO.SiO2 Nanocomposite for Water Pollutant Compound Methyl Orange Dye
Source: MDPI journal article supplement (doi:10.3390/nano11102548), 2021-09-28
Supplement: s1 [file s1]

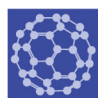

## Supplementary Materials

# Excellent UV-Light Triggered Photocatalytic Performance of ZnO.SiO<sub>2</sub> Nanocomposite for Water Pollutant Compound Methyl Orange Dye

Sunil Rohilla <sup>1</sup>, Ankita Gupta <sup>2</sup>, Vibhor Kumar <sup>3</sup>, Suman Kumari <sup>1</sup>, Michal Petru <sup>4</sup>, Nesrine Amor <sup>4</sup>, Muhammad Tayyab Noman <sup>4</sup> and Jasvir Dalal <sup>1,\*</sup>

<sup>1</sup> Department of Physics, Chaudhary Ranbir Singh University, Jind 126102, India; sunilrohilla@crsu.ac.in (S.R.); sumankkharb@gmail.com (S.K.)

<sup>2</sup> Department of Physics, Adarsh Mahila Mahavidyalaya, Bhiwani 127021, India; ankita13994@gmail.com

<sup>3</sup> Department of Electrical Engineering, Northern Illinois University, Dekalb, IL 60115, USA; vibhorsoni123@gmail.com

<sup>4</sup> Department of Machinery Construction, Institute for Nanomaterials, Advanced Technologies and Innovation, Technical University of Liberec, Studentská 46117, Czech Republic; michal.petru@tul.cz (M.P.); nesrine.amor@tul.cz (N.A.); tayyab\_noman411@yahoo.com (M.T.N.)

\* Correspondence: tayyab\_noman411@yahoo.com (M.T.N.); jasvirdalal2012@gmail.com (J.D.)

**Table S1.** Structural parameters of ZS1<sub>300</sub> achieved from X-ray Diffraction Pattern.

| S. no. | 2-theta | d-spacing | Intensity | (hkl) | FWHM   | Crystallite Size(nm) | Lattice Strain | Dislocation Density (10 <sup>-4</sup> nm <sup>-2</sup> ) | Microstrain |
|--------|---------|-----------|-----------|-------|--------|----------------------|----------------|----------------------------------------------------------|-------------|
| 1      | 31.851  | 2.809     | 557       | (100) | 0.2400 | 35.97                | 0.0037         | 7.7                                                      | 0.0576      |
| 2      | 34.552  | 2.599     | 410       | (002) | 0.2400 | 36.22                | 0.0034         | 7.6                                                      | 0.0572      |
| 3      | 36.358  | 2.471     | 999       | (101) | 0.2400 | 36.41                | 0.0032         | 7.5                                                      | 0.0570      |
| 4      | 47.698  | 0.908     | 218       | (102) | 0.2400 | 37.82                | 0.0024         | 6.9                                                      | 0.0548      |
| 5      | 56.751  | 1.625     | 318       | (110) | 0.2800 | 33.69                | 0.0023         | 8.8                                                      | 0.0615      |
| 6      | 63.093  | 1.485     | 284       | (103) | 0.3200 | 30.43                | 0.0023         | 10.8                                                     | 0.0681      |
| 7      | 66.565  | 1.406     | 43        | (200) | 0.2000 | 49.64                | 0.0013         | 4.0                                                      | 0.0417      |
| 8      | 68.168  | 1.378     | 235       | (112) | 0.2000 | 50.11                | 0.0013         | 3.9                                                      | 0.0414      |
| 9      | 69.291  | 1.357     | 116       | (201) | 0.2800 | 36.03                | 0.0018         | 7.7                                                      | 0.0575      |

**Table S2.** Fractional atomic coordinates and isothermal parameter of different atoms obtained from the Rietveld analysis of XRD patterns for the sample ZS1<sub>300</sub>.

| Parameters→ |           |           |           |                   |
|-------------|-----------|-----------|-----------|-------------------|
| Atoms ↓     | x/a       | y/b       | z/c       | Wyckoff positions |
| Zn          | 1/3       | 2/3       | ½         | 2b                |
| O           | 2/3       | 1/3       | 3/8       | 2b                |
| Si1         | 0.255(8)  | 0.255(8)  | 0.255(8)  | 4a                |
| Si2         | −0.008(8) | −0.008(8) | −0.008(8) | 4a                |
| O1          | 0.125(15) | 0.125(15) | 0.125(15) | 4a                |
| O2          | 0.660(15) | 0.660(15) | 0.062(15) | 12b               |

**Table S3.** Bond Length and bond angles of sample ZS1<sub>300</sub>.

| S. no. | Atom 1 | Atom 2 | d 1,2[Å] | A  | d 1,3[Å] | Angle 2,1,3[Å] |
|--------|--------|--------|----------|----|----------|----------------|
| 1      | Zn     | O      | 1.973    | O  | 1.973    | 0.094          |
| 2      | Zn     | O      | 1.973    | O  | 1.973    | 0.094          |
| 3      | Zn     | O      | 1.973    | O  | 1.977    | 108.579        |
| 4      | Zn     | O      | 1.973    | O  | 1.977    | 108.579        |
| 5      | Zn     | O      | 1.973    | O  | 1.977    | 108.579        |
| 6      | Zn     | O      | 1.973    | O  | 1.977    | 108.579        |
| 7      | Zn     | O      | 1.973    | O  | 1.9797   | 108.553        |
| 8      | Zn     | O      | 1.973    | O  | 1.9797   | 108.553        |
| 9      | Zn     | O      | 1.973    | O  | 1.9797   | 108.553        |
| 10     | Zn     | O      | 1.973    | O  | 1.9797   | 108.553        |
| 11     | Zn     | O      | 1.973    | O  | 1.9824   | 108.527        |
| 12     | Zn     | O      | 1.973    | Zn | 3.2073   | 35.753         |
| 13     | Zn     | O      | 1.973    | Zn | 3.2073   | 35.753         |
| 14     | Zn     | O      | 1.973    | Zn | 3.2073   | 144.247        |
| 15     | Zn     | O      | 1.973    | Zn | 3.2073   | 144.247        |
| 16     | Zn     | O      | 1.973    | Zn | 3.2073   | 35.753         |
| 17     | Zn     | O      | 1.973    | Zn | 3.2073   | 35.753         |
| 18     | Zn     | O      | 1.973    | Zn | 3.2073   | 144.247        |
| 19     | Zn     | O      | 1.973    | Zn | 3.2073   | 144.247        |
| 20     | Zn     | O      | 1.973    | Zn | 3.209    | 144.207        |
| 21     | Zn     | O      | 1.973    | Zn | 3.209    | 144.207        |
| 22     | Zn     | O      | 1.973    | Zn | 3.209    | 35.793         |
| 23     | Zn     | O      | 1.973    | Zn | 3.209    | 35.793         |
| 24     | Zn     | O      | 1.973    | Zn | 3.209    | 35.793         |
| 25     | Zn     | O      | 1.973    | Zn | 3.209    | 144.207        |
| 26     | Zn     | O      | 1.973    | Zn | 3.209    | 144.207        |
| 27     | Zn     | O      | 1.973    | Zn | 3.209    | 35.793         |
| 28     | Zn     | O      | 1.973    | Zn | 3.2106   | 144.166        |
| 29     | Zn     | O      | 1.973    | Zn | 3.2106   | 35.834         |
| 30     | Zn     | O      | 1.973    | O  | 3.2328   | 180            |
| 31     | Zn     | O      | 1.973    | O  | 3.2328   | 179.942        |
| 32     | Zn     | O      | 1.973    | O  | 3.2328   | 179.942        |
| 33     | Zn     | O      | 1.973    | Zn | 3.2459   | 90             |
| 34     | Zn     | O      | 1.973    | Zn | 3.2459   | 90             |
| 35     | Zn     | O      | 1.973    | Zn | 3.2475   | 90             |
| 36     | Zn     | O      | 1.973    | Zn | 3.2475   | 90             |
| 37     | Zn     | O      | 1.973    | Zn | 3.2475   | 90             |
| 38     | Zn     | O      | 1.973    | Zn | 3.2475   | 90             |
| 39     | Zn     | O      | 1.973    | Zn | 3.2491   | 90             |
| 40     | Zn     | O      | 1.973    | Zn | 3.2491   | 90             |
| 41     | Zn     | O      | 1.973    | Zn | 3.2491   | 90             |
| 42     | Zn     | O      | 1.973    | Zn | 3.2491   | 90             |
| 43     | Zn     | O      | 1.973    | Zn | 3.2491   | 90             |
| 44     | Zn     | O      | 1.973    | Zn | 3.2491   | 90             |
| 45     | Zn     | O      | 1.973    | Zn | 3.2507   | 90             |
| 46     | Zn     | O      | 1.973    | Zn | 3.2507   | 90             |
| 47     | Zn     | O      | 1.973    | Zn | 3.2507   | 90             |

|    |    |   |       |    |        |         |
|----|----|---|-------|----|--------|---------|
| 48 | Zn | O | 1.973 | Zn | 3.2507 | 90      |
| 49 | Zn | O | 1.973 | Zn | 3.2523 | 90      |
| 50 | Zn | O | 1.973 | Zn | 3.2523 | 90      |
| 51 | Zn | O | 1.973 | O  | 1.973  | 0.094   |
| 52 | Zn | O | 1.973 | O  | 1.977  | 108.661 |
| 53 | Zn | O | 1.973 | O  | 1.977  | 108.579 |
| 54 | Zn | O | 1.973 | O  | 1.977  | 108.579 |
| 55 | Zn | O | 1.973 | O  | 1.977  | 108.661 |
| 56 | Zn | O | 1.973 | O  | 1.9797 | 108.553 |
| 57 | Zn | O | 1.973 | O  | 1.9797 | 108.635 |
| 58 | Zn | O | 1.973 | O  | 1.9797 | 108.471 |
| 59 | Zn | O | 1.973 | O  | 1.9797 | 108.471 |
| 60 | Zn | O | 1.973 | O  | 1.9824 | 108.445 |
| 61 | Zn | O | 1.973 | Zn | 3.2073 | 35.834  |
| 62 | Zn | O | 1.973 | Zn | 3.2073 | 35.753  |
| 63 | Zn | O | 1.973 | Zn | 3.2073 | 144.329 |
| 64 | Zn | O | 1.973 | Zn | 3.2073 | 144.247 |
| 65 | Zn | O | 1.973 | Zn | 3.2073 | 35.752  |
| 66 | Zn | O | 1.973 | Zn | 3.2073 | 35.834  |
| 67 | Zn | O | 1.973 | Zn | 3.2073 | 144.329 |
| 68 | Zn | O | 1.973 | Zn | 3.2073 | 144.247 |
| 69 | Zn | O | 1.973 | Zn | 3.209  | 144.207 |
| 70 | Zn | o | 1.973 | Zn | 3.209  | 144.125 |
| 71 | Zn | o | 1.973 | Zn | 3.209  | 35.793  |
| 72 | Zn | o | 1.973 | Zn | 3.209  | 35.712  |
| 73 | Zn | o | 1.973 | Zn | 3.209  | 35.712  |
| 74 | Zn | o | 1.973 | Zn | 3.209  | 144.288 |
| 75 | Zn | o | 1.973 | Zn | 3.209  | 144.125 |
| 76 | Zn | o | 1.973 | Zn | 3.209  | 35.875  |
| 77 | Zn | o | 1.973 | Zn | 3.2106 | 144.084 |
| 78 | Zn | o | 1.973 | Zn | 3.2106 | 35.752  |
| 79 | Zn | O | 1.973 | O  | 3.2328 | 179.906 |
| 80 | Zn | O | 1.973 | O  | 3.2328 | 179.867 |
| 81 | Zn | O | 1.973 | O  | 3.2328 | 179.848 |
| 82 | Zn | O | 1.973 | Zn | 3.2459 | 90.094  |
| 83 | Zn | O | 1.973 | Zn | 3.2459 | 90.047  |

Table S4. Structural parameters of ZS1<sub>600</sub> achieved from X-ray Diffraction Pattern.

| Scheme 2 | 2-theta | Intensity | FWHM    | Crystallite Size (nm) | Dislocation Density (nm <sup>-2</sup> ) | Microstrain |
|----------|---------|-----------|---------|-----------------------|-----------------------------------------|-------------|
| 1        | 31.78   | 6147      | 0.21926 | 39.36                 | 0.00064549                              | 0.05272046  |
| 2        | 34.44   | 4364      | 0.22729 | 38.23                 | 0.00068421                              | 0.05427543  |
| 3        | 36.279  | 9574      | 0.2249  | 38.84                 | 0.00066289                              | 0.05343069  |
| 4        | 47.538  | 2134      | 0.27084 | 33.49                 | 0.000892                                | 0.061966    |
| 5        | 56.597  | 2973      | 0.29154 | 32.34                 | 0.000956                                | 0.064174    |
| 6        | 62.837  | 2495      | 0.32077 | 30.33                 | 0.001087                                | 0.068435    |
| 7        | 66.376  | 633       | 0.37468 | 26.48                 | 0.001426                                | 0.07839     |
| 8        | 67.956  | 2072      | 0.34616 | 28.92                 | 0.001196                                | 0.071764    |
| 9        | 69.096  | 1133      | 0.35454 | 28.43                 | 0.001237                                | 0.073004    |

**Table S5.** Structural parameters of ZS1<sub>900</sub> achieved from X-ray Diffraction Pattern.

| Sr. no. | 2-theta  | Intensity | FWHM     | Crystallite Size (nm) | Dislocation Density (nm <sup>-2</sup> ) | Microstrain |
|---------|----------|-----------|----------|-----------------------|-----------------------------------------|-------------|
| 1       | 13.05325 | 751.9     | 0.23867  | 35.01                 | 0.00081586                              | 0.05928079  |
| 2       | 22.17324 | 9018.9    | 0.190000 | 44.52                 | 0.000504533                             | 0.04661318  |
| 3       | 24.49324 | 790.4     | 0.40496  | 20.97                 | 0.002274066                             | 0.09893614  |
| 4       | 24.97324 | 1120.9    | 0.3321   | 25.6                  | 0.001525879                             | 0.08106113  |
| 5       | 25.89324 | 4269.9    | 0.200000 | 42.59                 | 0.000551296                             | 0.04872895  |
| 6       | 28.07324 | 866.4     | 0.72996  | 11.72                 | 0.007280225                             | 0.17704101  |
| 7       | 28.67324 | 855.4     | 0.55142  | 15.54                 | 0.004140931                             | 0.13356178  |
| 8       | 29.53324 | 597.4     | 0.65764  | 13.05                 | 0.005871904                             | 0.15897987  |
| 9       | 31.89323 | 4009.9    | 0.20000  | 43.16                 | 0.00053683                              | 0.0480759   |
| 10      | 34.37323 | 3838.9    | 0.21682  | 40.07                 | 0.000622818                             | 0.05178458  |
| 11      | 36.35323 | 1900.9    | 0.938    | 9.31                  | 0.011537206                             | 0.22279822  |
| 12      | 39.21323 | 1735.9    | 0.31222  | 28.22                 | 0.0012557                               | 0.07352926  |
| 13      | 41.19323 | 533.4     | 0.90165  | 9.84                  | 0.010327847                             | 0.2110042   |
| 14      | 43.09322 | 569.9     | 1.12895  | 7.91                  | 0.015982585                             | 0.26251449  |
| 15      | 45.39322 | 651.9     | 1.31756  | 6.83                  | 0.021436733                             | 0.30388233  |
| 16      | 47.31321 | 705.4     | 0.88918  | 10.19                 | 0.009630562                             | 0.20361466  |
| 17      | 49.29321 | 1451.9    | 0.39168  | 23.32                 | 0.001838836                             | 0.08899921  |
| 18      | 54.6332  | 461.9     | 1.31285  | 7.12                  | 0.019726045                             | 0.29161165  |
| 19      | 56.5532  | 630.4     | 1.55808  | 6.05                  | 0.027320538                             | 0.34303893  |
| 20      | 58.0132  | 637.9     | 0.68883  | 13.78                 | 0.005266251                             | 0.15060646  |
| 21      | 59.99319 | 568.9     | 1.09485  | 8.76                  | 0.013031421                             | 0.2370501   |
| 22      | 61.29319 | 622.4     | 0.8292   | 11.64                 | 0.00738064                              | 0.17834594  |
| 23      | 66.05318 | 1296.9    | 0.61068  | 16.21                 | 0.003805695                             | 0.12800123  |
| 24      | 69.03318 | 685.9     | 0.93018  | 10.83                 | 0.008525956                             | 0.19160828  |

**Table S6.** Structural parameters of ZS2<sub>300</sub> achieved from X-ray Diffraction.

| Sr. no. | 2-theta | Intensity | FWHM    | Crystallite Size (nm) | Dislocation Density (nm <sup>-2</sup> ) | Microstrain |
|---------|---------|-----------|---------|-----------------------|-----------------------------------------|-------------|
| 1       | 31.78   | 7344.031  | 0.25029 | 34.48                 | 0.000841                                | 0.060181    |
| 2       | 34.42   | 6553.031  | 0.25686 | 33.83                 | 0.000874                                | 0.061339    |
| 3       | 36.23   | 10116.03  | 0.26699 | 32.71                 | 0.000935                                | 0.063439    |
| 4       | 47.558  | 4609.031  | 0.28763 | 31.54                 | 0.001005                                | 0.065803    |
| 5       | 56.597  | 5554.031  | 0.35057 | 26.89                 | 0.001383                                | 0.07716     |
| 6       | 62.877  | 5106.031  | 0.3907  | 24.9                  | 0.001613                                | 0.083336    |
| 7       | 66.3766 | 3578.731  | 0.39489 | 25.12                 | 0.001585                                | 0.082611    |
| 8       | 67.976  | 5027.031  | 0.37244 | 26.88                 | 0.001384                                | 0.077202    |
| 9       | 69.076  | 4055.031  | 0.40457 | 24.91                 | 0.001612                                | 0.083316    |

**Table S7.** Structural parameters of ZS2<sub>600</sub> achieved from X-ray Diffraction Pattern.

| Sr. no. | 2-theta  | Intensity | FWHM    | Crystallite Size (nm) | Dislocation Density (nm <sup>-2</sup> ) | Microstrain |
|---------|----------|-----------|---------|-----------------------|-----------------------------------------|-------------|
| 1       | 31.78022 | 5888.5    | 0.25    | 34.52                 | 0.000839                                | 0.060112    |
| 2       | 34.44003 | 4288.5    | 0.24909 | 34.89                 | 0.000821                                | 0.059481    |
| 3       | 36.27989 | 9721.5    | 0.25356 | 34.45                 | 0.000843                                | 0.060239    |
| 4       | 47.55886 | 2053.5    | 0.28763 | 31.54                 | 0.001005                                | 0.065803    |
| 5       | 56.59786 | 2998.5    | 0.30626 | 30.78                 | 0.001056                                | 0.067414    |
| 6       | 62.87707 | 2550.5    | 0.32788 | 29.68                 | 0.001135                                | 0.069937    |
| 7       | 66.3766  | 423.2     | 0.39489 | 25.12                 | 0.001585                                | 0.082619    |
| 8       | 67.95638 | 2124.5    | 0.3447  | 29.04                 | 0.001186                                | 0.071461    |
| 9       | 69.07622 | 1049.5    | 0.35373 | 28.49                 | 0.001232                                | 0.072846    |
